# Supplementary material
Source: MDPI journal article supplement (https://www.mdpi.com/search?q=molbank-2020-M1108)
Supplement: s002 [file molbank-2020-M1108-s002.mol]

molbank-679205.mol
  ChemDraw11302014442D

 32 37  0  0  0  0  0  0  0  0999 V2000
    0.8520   -0.9164    0.0000 C   0  0  0  0  0  0  0  0  0  0  0  0
   -2.0990   -0.6175    0.0000 C   0  0  0  0  0  0  0  0  0  0  0  0
   -1.6865   -1.3320    0.0000 C   0  0  0  0  0  0  0  0  0  0  0  0
   -1.2740   -0.6175    0.0000 C   0  0  0  0  0  0  0  0  0  0  0  0
   -0.8615   -1.3320    0.0000 C   0  0  0  0  0  0  0  0  0  0  0  0
   -0.1471   -0.9195    0.0000 C   0  0  0  0  0  0  0  0  0  0  0  0
   -2.8959   -0.8310    0.0000 O   0  0  0  0  0  0  0  0  0  0  0  0
   -1.6865    0.0970    0.0000 C   0  0  0  0  0  0  0  0  0  0  0  0
   -3.3084   -0.1165    0.0000 C   0  0  0  0  0  0  0  0  0  0  0  0
   -2.4834   -0.1165    0.0000 O   0  0  0  0  0  0  0  0  0  0  0  0
   -3.5220    0.6804    0.0000 C   0  0  0  0  0  0  0  0  0  0  0  0
   -4.0229   -0.5290    0.0000 C   0  0  0  0  0  0  0  0  0  0  0  0
   -2.5115   -1.3320    0.0000 O   0  0  0  0  0  0  0  0  0  0  0  0
   -0.5596   -0.2050    0.0000 O   0  0  0  0  0  0  0  0  0  0  0  0
   -0.1471   -1.9234    0.0000 O   0  0  0  0  0  0  0  0  0  0  0  0
    0.2970   -1.3324    0.0000 O   0  0  0  0  0  0  0  0  0  0  0  0
    1.6051   -1.1659    0.0000 O   0  0  0  0  0  0  0  0  0  0  0  0
    2.1751   -0.6251    0.0000 C   0  0  0  0  0  0  0  0  0  0  0  0
    1.7695    0.0231    0.0000 C   0  0  0  0  0  0  0  0  0  0  0  0
    0.9687   -0.1717    0.0000 C   0  0  0  0  0  0  0  0  0  0  0  0
    2.6369    0.1061    0.0000 C   0  0  0  0  0  0  0  0  0  0  0  0
    1.8809    0.7503    0.0000 O   0  0  0  0  0  0  0  0  0  0  0  0
    1.1433    0.9635    0.0000 C   0  0  0  0  0  0  0  0  0  0  0  0
    0.6369    0.3113    0.0000 O   0  0  0  0  0  0  0  0  0  0  0  0
    0.6179    1.5400    0.0000 C   0  0  0  0  0  0  0  0  0  0  0  0
    1.4044    1.7373    0.0000 C   0  0  0  0  0  0  0  0  0  0  0  0
    3.3240   -0.1150    0.0000 C   0  0  0  0  0  0  0  0  0  0  0  0
    3.9252    0.4917    0.0000 O   0  0  0  0  0  0  0  0  0  0  0  0
    3.5340    1.1255    0.0000 C   0  0  0  0  0  0  0  0  0  0  0  0
    2.8134    0.8494    0.0000 O   0  0  0  0  0  0  0  0  0  0  0  0
    3.3645    1.9234    0.0000 C   0  0  0  0  0  0  0  0  0  0  0  0
    4.0229    1.8079    0.0000 C   0  0  0  0  0  0  0  0  0  0  0  0
  2  3  1  1      
  2  4  1  0      
  3  5  1  1      
  5  6  1  0      
  2  7  1  0      
  4  8  1  0      
  7  9  1  0      
  9 10  1  0      
 10  8  1  0      
  9 11  1  0      
  9 12  1  0      
  3 13  1  0      
  4 14  1  0      
 14  6  1  0      
  6 15  1  0      
  5 16  1  0      
  6  1  1  0      
 16  1  1  0      
 18 17  1  1      
 19 18  1  1      
 19 20  1  0      
 18 21  1  0      
 19 22  1  0      
 22 23  1  0      
 23 24  1  0      
 24 20  1  0      
 23 25  1  0      
 23 26  1  0      
 21 27  1  1      
 27 28  1  1      
 28 29  1  0      
 29 30  1  0      
 30 21  1  0      
 29 31  1  0      
 29 32  1  0      
 20  1  1  0      
  1 17  1  1      
M  END
